# Supplementary material
Source: PubMed Central journal article supplement (PMC3773777)
Supplement: 1313316110_pnas.201313316SI.pdf [file 1313316110_pnas.201313316SI.pdf]

# Supporting Information

He et al. 10.1073/pnas.1313316110

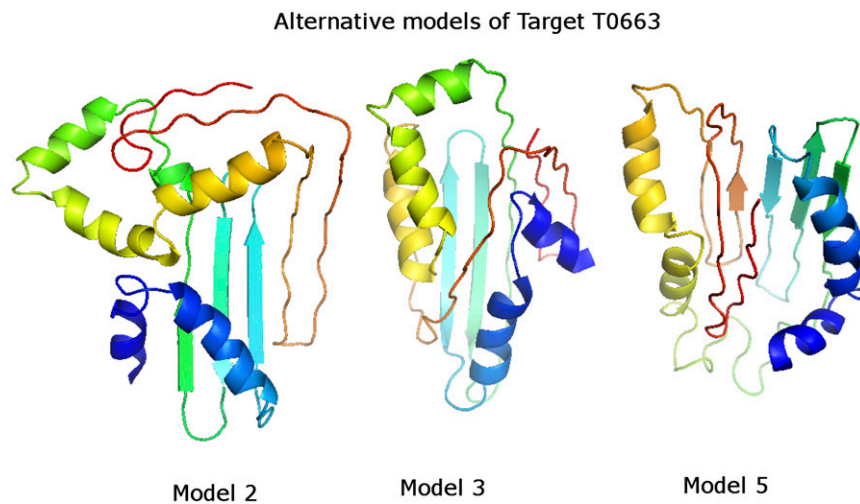

**Fig. S1.** Alternative models of target T0663 obtained with the United Residue force field in the 10th Community Wide Experiment on the Critical Assessment of Techniques for Protein Structure Prediction.
